# Supplementary material for: Fabrication of 2D Vanadium MXene Polyphenylsulfone Ultrafiltration Membrane for Enhancing the Water Flux and for Effective Separation of Humic Acid and Dyes from Wastewater
Source: PubMed Central journal article supplement — ACS Omega. 2024 Jun 3;9(24):25766–78. doi: 10.1021/acsomega.3c10078 (PMC11191084; doi:10.1021/acsomega.3c10078), 2024-06-03
Supplement: ao3c10078_si_001.pdf [file ao3c10078_si_001.pdf]

**Fabrication of 2D vanadium MXene polyphenylsulfone ultrafiltration  
membrane enhancing the water flux and for effective separation of humic acid  
and dyes from wastewater.**

Prabhakar Satishkumar<sup>a</sup>, Arun M. Isloor<sup>a\*</sup>, Lakshmi Nidhi Rao<sup>b</sup> and Ramin Farnood<sup>c</sup>

<sup>a</sup>Membrane and Separation Technology Laboratory, Department of Chemistry, National Institute of Technology Karnataka, Surathkal, 575 025, Mangalore, India.

<sup>b</sup>Department of Conservative Dentistry and Endodontics, A.B.Shetty Memorial Institute of Dental Sciences, Nitte deemed to be University, Deralakatte, Mangalore 575018, India

<sup>c</sup>Department of Chemical Engineering and Applied Chemistry, University of Toronto, M5R OA3, Toronto, Canada.

\*E-mail : [isloor@yahoo.com](mailto:isloor@yahoo.com)

**S1. Synthesis of Vanadium MXene ( $V_2CT_x$ )**

10 mL of HCl was added to 120 mL polypropylene (PP) bottle and in the next step 20 mL 40% HF was added carefully following all the necessary safety precautions in relation with highly corrosive HF. The PP bottle was kept in an ice bath and 1 gm  $V_2AlC$  was added gradually for a time period of 15 minutes. Experimental setup image during the addition of  $V_2AlC$  was given in the Figure S1. After the addition of  $V_2AlC$  powder the PP bottle was kept in an oil bath and the mixture was stirred for 84 hours at 80°C. All the contents inside the PP bottle was transferred to 50 mL centrifuge tube and centrifuged at 3500 rpm for 5 minutes. Discarded the supernatant, sediment was dispersed in 40 mL of DI water and centrifuged. Repeated the same

procedure until supernatant crossed pH 5. The contents of the centrifuge tube are filtered to obtain V<sub>2</sub>CT<sub>x</sub> Mxene nanosheets. The obtained residue was dried by keeping it on a vacuum oven at 60°C for 50 hours. The dried V<sub>2</sub>CT<sub>x</sub> powder was used for all the characterization and membrane fabrication.

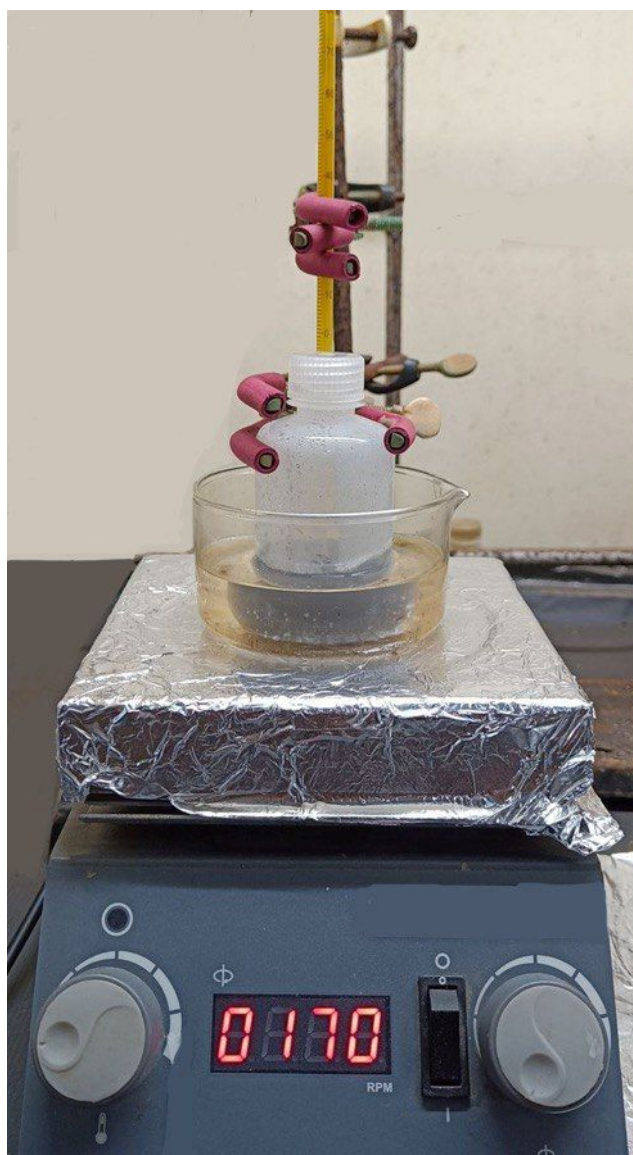

Figure S1. Experimental setup for etching of Al from V<sub>2</sub>AlC.
